# Supplementary material
Source: publisher figshare collection journal article supplement (https://tandf.figshare.com/ndownloader/files/30926320)
Supplement: Supplementary file 4 [file 30926320]

# A NODEWISE REGRESSION APPROACH TO ESTIMATING LARGE PORTFOLIOS: EMPIRICAL APPLICATION

CANER, ULASAN, CALLOT, ÖNDER

This document is generated from a `knitr` file which contains all the code necessary to replicate the tables in the application. To replicate these results, simply compile the file with the `knitr` package for R.

## 1. DATA

**1.1. Main Tables.** Monthly data in the main text is spanning from January 1994 to May 2018 consisting of  $n = 293$  and  $p = 304$ . Return target is set to 0.7974% (monthly equivalent of 10% for a year). Daily data starts from 2013-07-02 to 2018-04-30 with  $n = 1216$  and  $p = 452$ . Return target is set to 0.0378% (daily equivalent of 10% for a year). In-sample and out-of-sample periods:

Monthly data:

- $n_I = 195$ ,  $n - n_I = 98$ . Out-of-sample 98 period covers April 2010 to May 2018.
- $n_I = 173$ ,  $n - n_I = 120$ . Out-of-sample 120 period covers June 2008 to May 2018.

Daily data:

- $n_I = 1153$ ,  $n - n_I = 63$ . Out-of-sample 63 period covers 2018-01-30 to 2018-04-30.
- $n_I = 964$ ,  $n - n_I = 252$ . Out-of-sample 252 period covers 2017-05-01 to 2018-04-30.

**1.2. Supplementary Tables.** We report extra tables for robustness checks in Appendix. Monthly data starts from August 2006 to April 2018 including  $n = 141$  and  $p = 419$ . First daily data starts from 2017-06-01 to 2018-05-31 with  $n = 252$  and  $p = 442$ . Second daily example starts from 2016-06-07 to 2018-05-31.  $n = 500$  and  $p = 442$ . Return targets for monthly and daily data are set to 0.7974% and 0.0378%, respectively.

Monthly data:

- $n_I = 93$ ,  $n - n_I = 48$ . Out-of-sample 48 period covers May 2014 to April 2018.
- $n_I = 81$ ,  $n - n_I = 60$ . Out-of-sample 60 period covers May 2013 to April 2018.

Daily data:

- $n_I = 126$ ,  $n - n_I = 126$ . Out-of-sample 126 period covers 2017-11-29 to 2018-05-31 (First).
- $n_I = 437$ ,  $n - n_I = 63$ . Out-of-sample 63 period covers 2018-03-02 to 2018-05-31 (Second).

## 2. RESULTS

TABLE 1. Monthly Portfolio Performance of  $n_I = 195$ ,  $n - n_I = 98$ 

| Estimator                       | Global Minimum Portfolio |          |        |          | Markowitz Portfolio |          |          |          |
|---------------------------------|--------------------------|----------|--------|----------|---------------------|----------|----------|----------|
|                                 | Return                   | Variance | Sharpe | Turnover | Return              | Variance | Sharpe   | Turnover |
| <b>without transaction cost</b> |                          |          |        |          |                     |          |          |          |
| POET                            | 0.02499                  | 0.01953  | 0.1788 | 0.2080   | 0.03317             | 0.05248  | 0.14481  | 0.2497   |
| NodeWise                        | 0.02644                  | 0.01580  | 0.2104 | 0.1268   | 0.03503             | 0.04585  | 0.16358  | 0.1709   |
| Ledoit-Wolf                     | 0.07140                  | 0.18421  | 0.1664 | 0.2150   | -0.01128            | 0.24568  | -0.02276 | 0.4421   |
| <b>with transaction cost</b>    |                          |          |        |          |                     |          |          |          |
| POET                            | 0.02497                  | 0.01964  | 0.1782 | NA       | 0.03324             | 0.05274  | 0.14474  | NA       |
| NodeWise                        | 0.02650                  | 0.01590  | 0.2102 | NA       | 0.03517             | 0.04613  | 0.16374  | NA       |
| Ledoit-Wolf                     | 0.07175                  | 0.18545  | 0.1666 | NA       | -0.01166            | 0.24733  | -0.02345 | NA       |

TABLE 2. Monthly Portfolio Performance of  $n_I = 173$ ,  $n - n_I = 120$ 

| Estimator                       | Global Minimum Portfolio |          |        |          | Markowitz Portfolio |          |          |          |
|---------------------------------|--------------------------|----------|--------|----------|---------------------|----------|----------|----------|
|                                 | Return                   | Variance | Sharpe | Turnover | Return              | Variance | Sharpe   | Turnover |
| <b>without transaction cost</b> |                          |          |        |          |                     |          |          |          |
| POET                            | 0.02078                  | 0.01805  | 0.1547 | 0.1806   | 0.022689            | 0.02537  | 0.14246  | 0.2232   |
| NodeWise                        | 0.02158                  | 0.01254  | 0.1927 | 0.1357   | 0.024571            | 0.02054  | 0.17143  | 0.1759   |
| Ledoit-Wolf                     | 0.05039                  | 0.11844  | 0.1464 | 0.2795   | -0.009022           | 0.13209  | -0.02482 | 1.8899   |
| <b>with cost</b>                |                          |          |        |          |                     |          |          |          |
| POET                            | 0.02070                  | 0.01813  | 0.1538 | NA       | 0.022634            | 0.02548  | 0.14180  | NA       |
| NodeWise                        | 0.02156                  | 0.01261  | 0.1920 | NA       | 0.024580            | 0.02064  | 0.17109  | NA       |
| Ledoit-Wolf                     | 0.05041                  | 0.11904  | 0.1461 | NA       | -0.009442           | 0.13282  | -0.02591 | NA       |

TABLE 3. Daily Portfolio Performance of  $n_I = 964$ ,  $n - n_I = 252$ 

| Estimator                       | Global Minimum Portfolio |           |          |          | Markowitz Portfolio |           |         |          |
|---------------------------------|--------------------------|-----------|----------|----------|---------------------|-----------|---------|----------|
|                                 | Return                   | Variance  | Sharpe   | Turnover | Return              | Variance  | Sharpe  | Turnover |
| <b>without transaction cost</b> |                          |           |          |          |                     |           |         |          |
| POET                            | 4.537e-04                | 4.757e-05 | 0.065774 | 0.06856  | 0.0003757           | 4.630e-05 | 0.05521 | 0.08844  |
| NodeWise                        | 4.424e-04                | 4.499e-05 | 0.065957 | 0.05701  | 0.0003731           | 4.421e-05 | 0.05611 | 0.07217  |
| Ledoit-Wolf                     | 4.103e-04                | 3.566e-05 | 0.068707 | 0.34305  | 0.0005329           | 3.738e-05 | 0.08716 | 0.35390  |
| <b>with transaction cost</b>    |                          |           |          |          |                     |           |         |          |
| POET                            | 4.225e-04                | 4.765e-05 | 0.061205 | NA       | 0.0003268           | 4.629e-05 | 0.04804 | NA       |
| NodeWise                        | 4.161e-04                | 4.492e-05 | 0.062080 | NA       | 0.0003319           | 4.416e-05 | 0.04995 | NA       |
| Ledoit-Wolf                     | 4.174e-05                | 3.563e-05 | 0.006994 | NA       | 0.0001490           | 3.766e-05 | 0.02428 | NA       |

TABLE 4. Daily Portfolio Performance of  $n_I = 1153$ ,  $n - n_I = 63$ 

| Estimator                       | Global Minimum Portfolio |           |          |          | Markowitz Portfolio |           |          |          |
|---------------------------------|--------------------------|-----------|----------|----------|---------------------|-----------|----------|----------|
|                                 | Return                   | Variance  | Sharpe   | Turnover | Return              | Variance  | Sharpe   | Turnover |
| <b>without transaction cost</b> |                          |           |          |          |                     |           |          |          |
| POET                            | -0.0009237               | 1.330e-04 | -0.08008 | 0.01109  | -0.0010352          | 1.217e-04 | -0.09383 | 0.03717  |
| NodeWise                        | -0.0008794               | 1.262e-04 | -0.07828 | 0.05404  | -0.0009344          | 1.187e-04 | -0.08577 | 0.07096  |
| Ledoit-Wolf                     | -0.0008008               | 5.874e-05 | -0.10448 | 0.32694  | -0.0007186          | 6.119e-05 | -0.09187 | 0.34190  |
| <b>with transaction cost</b>    |                          |           |          |          |                     |           |          |          |
| POET                            | -0.0008059               | 1.341e-04 | -0.06958 | NA       | -0.0009325          | 1.226e-04 | -0.08422 | NA       |
| NodeWise                        | -0.0008323               | 1.276e-04 | -0.07368 | NA       | -0.0009019          | 1.200e-04 | -0.08233 | NA       |
| Ledoit-Wolf                     | -0.0012583               | 5.942e-05 | -0.16323 | NA       | -0.0012106          | 6.221e-05 | -0.15349 | NA       |

TABLE 5. Monthly Portfolio Performance of  $n_I = 93$ ,  $n - n_I = 48$ 

| Estimator                       | Global Minimum Portfolio |           |        |          | Markowitz Portfolio |           |         |          |
|---------------------------------|--------------------------|-----------|--------|----------|---------------------|-----------|---------|----------|
|                                 | Return                   | Variance  | Sharpe | Turnover | Return              | Variance  | Sharpe  | Turnover |
| <b>without transaction cost</b> |                          |           |        |          |                     |           |         |          |
| POET                            | 0.010962                 | 0.0009158 | 0.3622 | 0.06648  | 0.009260            | 0.0009567 | 0.2994  | 0.1768   |
| NodeWise                        | 0.010202                 | 0.0006495 | 0.4003 | 0.16511  | 0.008762            | 0.0006994 | 0.3313  | 0.2466   |
| Ledoit-Wolf                     | 0.009892                 | 0.0036172 | 0.1645 | 0.08129  | -0.030062           | 0.0113491 | -0.2822 | 0.1608   |
| <b>with transaction cost</b>    |                          |           |        |          |                     |           |         |          |
| POET                            | 0.011106                 | 0.0009331 | 0.3636 | NA       | 0.009198            | 0.0009756 | 0.2945  | NA       |
| NodeWise                        | 0.010181                 | 0.0006621 | 0.3957 | NA       | 0.008525            | 0.0007133 | 0.3192  | NA       |
| Ledoit-Wolf                     | 0.009897                 | 0.0036978 | 0.1628 | NA       | -0.030948           | 0.0116061 | -0.2873 | NA       |

TABLE 6. Monthly Portfolio Performance of  $n_I = 81$ ,  $n - n_I = 60$ 

| Estimator                       | Global Minimum Portfolio |           |        |          | Markowitz Portfolio |           |         |          |
|---------------------------------|--------------------------|-----------|--------|----------|---------------------|-----------|---------|----------|
|                                 | Return                   | Variance  | Sharpe | Turnover | Return              | Variance  | Sharpe  | Turnover |
| <b>without transaction cost</b> |                          |           |        |          |                     |           |         |          |
| POET                            | 0.008610                 | 0.0024127 | 0.1753 | 0.1786   | 0.007004            | 0.0027565 | 0.1334  | 0.2867   |
| NodeWise                        | 0.011891                 | 0.0006604 | 0.4627 | 0.1624   | 0.010726            | 0.0007659 | 0.3876  | 0.2572   |
| Ledoit-Wolf                     | 0.016445                 | 0.0041433 | 0.2555 | 0.0797   | -0.036767           | 0.0165209 | -0.2861 | 0.1967   |
| <b>with cost</b>                |                          |           |        |          |                     |           |         |          |
| POET                            | 0.008453                 | 0.0024584 | 0.1705 | NA       | 0.006645            | 0.0028086 | 0.1254  | NA       |
| NodeWise                        | 0.011876                 | 0.0006702 | 0.4587 | NA       | 0.010507            | 0.0007785 | 0.3766  | NA       |
| Ledoit-Wolf                     | 0.016543                 | 0.0042104 | 0.2550 | NA       | -0.037628           | 0.0168314 | -0.2900 | NA       |

TABLE 7. Daily Portfolio Performance of  $n_I = 126$ ,  $n - n_I = 126$ 

| Estimator                       | Global Minimum Portfolio |           |            |          | Markowitz Portfolio |           |           |          |
|---------------------------------|--------------------------|-----------|------------|----------|---------------------|-----------|-----------|----------|
|                                 | Return                   | Variance  | Sharpe     | Turnover | Return              | Variance  | Sharpe    | Turnover |
| <b>without transaction cost</b> |                          |           |            |          |                     |           |           |          |
| POET                            | 1.218e-04                | 7.940e-05 | 0.0136711  | 0.4532   | 1.684e-04           | 7.619e-05 | 0.019291  | 0.4224   |
| NodeWise                        | 4.065e-04                | 8.188e-05 | 0.0449221  | 0.1542   | 3.762e-04           | 7.987e-05 | 0.042097  | 0.1753   |
| Ledoit-Wolf                     | 3.479e-04                | 4.651e-05 | 0.0510130  | 0.3991   | 3.955e-04           | 4.681e-05 | 0.057807  | 0.3992   |
| <b>with transaction cost</b>    |                          |           |            |          |                     |           |           |          |
| POET                            | -2.633e-04               | 8.206e-05 | -0.0290615 | NA       | -1.856e-04          | 7.850e-05 | -0.020947 | NA       |
| NodeWise                        | 3.192e-04                | 8.218e-05 | 0.0352120  | NA       | 2.678e-04           | 8.019e-05 | 0.029909  | NA       |
| Ledoit-Wolf                     | 2.383e-06                | 4.711e-05 | 0.0003472  | NA       | 5.006e-05           | 4.762e-05 | 0.007254  | NA       |

TABLE 8. Daily Portfolio Performance of  $n_I = 437$ ,  $n - n_I = 63$ 

| Estimator                       | Global Minimum Portfolio |           |          |          | Markowitz Portfolio |           |          |          |
|---------------------------------|--------------------------|-----------|----------|----------|---------------------|-----------|----------|----------|
|                                 | Return                   | Variance  | Sharpe   | Turnover | Return              | Variance  | Sharpe   | Turnover |
| <b>without transaction cost</b> |                          |           |          |          |                     |           |          |          |
| POET                            | 0.0003121                | 7.650e-05 | 0.03568  | 0.02623  | 0.0002721           | 7.108e-05 | 0.03227  | 0.0445   |
| NodeWise                        | 0.0003022                | 7.642e-05 | 0.03457  | 0.09568  | 0.0002943           | 7.376e-05 | 0.03427  | 0.1056   |
| Ledoit-Wolf                     | -0.0002426               | 4.061e-05 | -0.03806 | 0.44835  | -0.0001681          | 4.071e-05 | -0.02635 | 0.4550   |
| <b>with transaction cost</b>    |                          |           |          |          |                     |           |          |          |
| POET                            | 0.0004437                | 7.621e-05 | 0.05082  | NA       | 0.0003863           | 7.077e-05 | 0.04592  | NA       |
| NodeWise                        | 0.0003700                | 7.596e-05 | 0.04246  | NA       | 0.0003533           | 7.331e-05 | 0.04126  | NA       |
| Ledoit-Wolf                     | -0.0005871               | 4.103e-05 | -0.09165 | NA       | -0.0005113          | 4.117e-05 | -0.07970 | NA       |
